# Supplementary material for: Synthesis and structures of selected benzamidinates of Li, Na, Al, Zr and Sn(ii) using the C1-symmetric ligands [N(SiMe3)C(C6H4Me-4 or Ph)NPh]?
Source: Royal Society of Chemistry journal article supplement (doi:10.1039/b614351b), 2007-01-01
Supplement: b614351b.pdf [file b614351b.pdf]

**Synthesis and structures of selected benzamidates of Li, Na, Al, Zr and Sn(II)  
using the  $C_1$ -symmetric ligands  $[N(SiMe_3)C(C_6H_4Me-4 \text{ or Ph})NPh]^-$**

**Peter B. Hitchcock,<sup>a</sup> Michael F. Lappert<sup>\*a</sup> and Philippe G. Merle<sup>b</sup>**

*The Chemistry Department, University of Sussex, Brighton, BN1 9QJ, U.K. Fax: 44 1273 677196; Tel:  
44 1273 678316; E-mail: [m.f.lappert@sussex.ac.uk](mailto:m.f.lappert@sussex.ac.uk)*

<sup>b</sup> *Department of Chemistry and Biochemistry, Concordia University, H4B 1R6 Montreal, Canada.*

**SUP Table 1** Selected bond lengths [Å] and angles [°] for **3**

|                |            |                 |            |
|----------------|------------|-----------------|------------|
| Al-C(1)        | 2.383(4)   | Al-C(18)        | 2.390(4)   |
| Al-Cl/C(35)    | 2.1101(8)  |                 |            |
| Al-N(1)        | 1.9998(12) | Al-N(3)         | 2.0140(13) |
| Al-N(2)        | 1.9346(13) | Al-N(4)         | 1.9322(13) |
| C(1)-N(1)      | 1.3179(19) | C(18)-N(3)      | 1.3214(19) |
| C(1)-N(2)      | 1.3485(18) | C(18)-N(4)      | 1.3419(19) |
|                |            |                 |            |
| N(1)-Al-N(2)   | 67.98(5)   | N(3)-Al-N(4)    | 67.68(5)   |
| N(1)-Al-N(3)   | 163.04(6)  | N(4)-Al-N(2)    | 113.69(6)  |
| N(1)-Al-N(4)   | 101.31(5)  | N(3)-Al-N(2)    | 103.75(5)  |
| N(1)-C(1)-N(2) | 111.20(12) | N(3)-C(18)-N(4) | 111.27(13) |
| C(1)-N(1)-Al   | 89.38(9)   | C(18)-N(3)-Al   | 89.05(9)   |
| C(1)-N(2)-Al   | 91.30(9)   | C(18)-N(4)-Al   | 91.99(9)   |

---

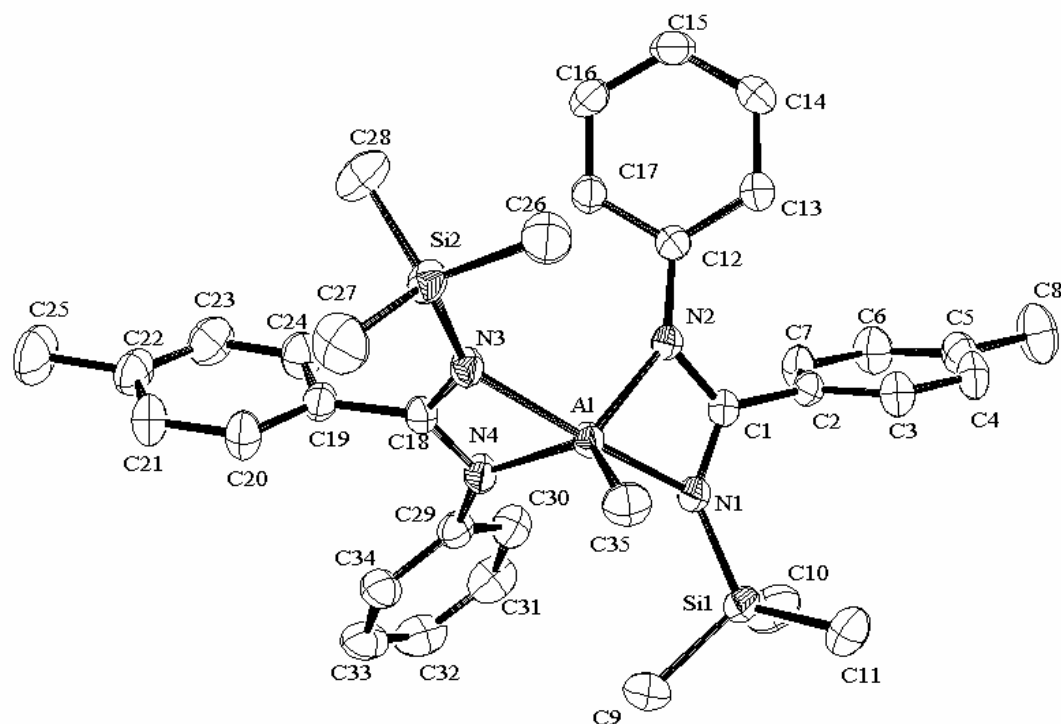

SUP Fig. 1 Molecular structure of  $[Al\{\kappa^2-N(R)C(C_6H_4Me-4)NPh\}_2X]$  (**3**) ( $X = Cl/Me$ )
